# Supplementary material
Source: publisher site journal article supplement (https://thieme-connect.com/media/10.1055-s-00035037/201603/supmat/10-3414-me15-01-0131-suppl.pdf)
Supplement: Supplementary file 1 [file 10-3414-me15-01-0131-suppl.pdf]

# Is there a consensus when physicians evaluate the relevance of retrieved systematic reviews? Online appendices

## Appendix 1. Sample screen from the web-based survey application

### Evaluate Evidence Retrieved for Vignette #6

#### Full Description

An almost-3-year-old girl is sent in from a walk-in clinic by car. She was diagnosed with asthma at age 1 year and has been assessed in the Chest Clinic for recurrent wheezing episodes. Her last exacerbation was 7 months ago, despite compliant use of daily Flovent. She has allergy to nuts and fish. There is a family history of asthma. 30 hours ago, she developed URTI symptoms but has not had a fever. The parents have given Ventolin 5 times in the last 24 hrs. She is afebrile, saturations 93%, HR 124, RR 32. She has moderate distress with air entry diminished to the bases, suprasternal and scalene retractions, and both inspiratory and expiratory wheezing.

#### Diagnosis

Severe exacerbation (verified in follow-up)

#### Treatment

Oxygen, beta agonists, corticosteroids, anticholinergics, magnesium sulfate, methylxanthines (according to the CAEP paediatric asthma guideline)

#### Retrieved Systematic Reviews

For the systematic reviews listed, please rank their relevance to the clinical scenario, from 1 (*most relevant*) to 3 (*least relevant*), or X (*not relevant at all*).

| Review                                                                                                                           | Relevance                                                                                                  |
|----------------------------------------------------------------------------------------------------------------------------------|------------------------------------------------------------------------------------------------------------|
| 3 <a href="#">Combined inhaled anticholinergics and beta2-agonists for initial treatment of acute asthma in children</a>         | 1 <input type="radio"/> 2 <input checked="" type="radio"/> 3 <input type="radio"/> X <input type="radio"/> |
| 1 <a href="#">Oral xanthines as maintenance treatment for asthma in children</a>                                                 | 1 <input checked="" type="radio"/> 2 <input type="radio"/> 3 <input type="radio"/> X <input type="radio"/> |
| 2 <a href="#">Intravenous aminophylline for acute severe asthma in children over two years receiving inhaled bronchodilators</a> | 1 <input type="radio"/> 2 <input type="radio"/> 3 <input type="radio"/> X <input checked="" type="radio"/> |

#### Comments

If you have any comments on the retrieved reviews or other issues related to the current encounter, please provide them below.

The last review is irrelevant for this vignette. I would recommend replacing it by review #34.

Retrieval ranks, not presented to the participant

Evaluation ranks provided by the participant

## Appendix 2. Group value function

| Code | Marginal value |            |            |
|------|----------------|------------|------------|
|      | Position 1     | Position 2 | Position 3 |
| Y    | 0.52           | 0.32       | 0.16       |
| N    | 0.26           | 0.26       | 0.11       |
| X    | 0.00           | 0.00       | 0.00       |

Group value function offers a thorough assessment of a triple that is richer than precision at 3. For example, the two coded triples *NXY* and *YXN* have the same value of precision at 3 (it is  $2/3 = 0.66$ ), while the group value function gives a better insight into ranking as it indicates that the latter triple is “more preferred” than the former ( $0.26 + 0.00 + 0.16 = 0.42$  for *NXY* vs.  $0.52 + 0.00 + 0.11 = 0.63$  for *YXN*).

### Appendix 3. Coded triples representing relevance evaluations by physicians

| Participant | Vignette |     |     |     |     |     |     |     |     |     |     |     |     |     |
|-------------|----------|-----|-----|-----|-----|-----|-----|-----|-----|-----|-----|-----|-----|-----|
|             | 1        | 2   | 3   | 4   | 5   | 6   | 7   | 8   | 9   | 10  | 11  | 12  | 13  | 14  |
| sp2         | XXX      | XXX | YXX | NXN | YNN | NYN | YXX | NYN | XXN | NYN | YXX | NYN | YXX | YXX |
| sp3         | XNN      | XXX | XNN | NXN | YNN | NYN | YXX | NYN | XYX | NYN | YNN | NYN | NNY | YXN |
| sp4         | NNY      | XXX | NXN | XXN | YXN | XYN | YXX | XYN | YXN | XNX | YXN | XYN | XXN | NNN |
| sp5         | XXX      | XXX | XXX | XXX | NXX | XNN | YXX | XNN | NNX | XNN | NXX | XNN | XXX | NXX |
| sp6         | XNX      | YXN | XXN | XXN | NXN | NYN | NNN | NYN | XXX | NXN | YNN | NYN | YYY | YXN |
| sp7         | XXN      | XXX | XXY | XXX | YXY | NYN | YNX | NNN | XXY | XYN | YXX | XYN | XXY | YXX |
| sp8         | XXX      | NXN | XYN | NXN | YNN | XYN | YNN | XYN | NXN | XXN | YNN | XXY | XYN | YXN |
| sp9         | NNY      | YXX | XXX | XXN | YXX | XYN | YXX | XYN | XXX | XNN | YXX | XYN | YYY | YNN |
| sp10        | NNY      | YXN | NXN | NXN | YNN | XYN | YYY | XYN | XXY | XXN | YYY | XYN | YYY | YNN |
| sp11        | NNY      | YXN | NXN | NXN | YNN | NYN | YXX | NYN | XXX | XYN | YNN | NYN | NNN | YNN |
| sp12        | NNN      | XXX | NXN | NXN | YXN | NYN | YYX | NYN | YXX | NXN | YYY | XYN | YXN | YXN |
| sp14        | NYN      | YXX | NNN | NNN | YNN | NNN | YYX | NYN | YXX | NXN | YYY | NYN | YYY | YXN |
| sp16        | NNN      | YXX | XXN | NXN | NXN | NNN | YYX | NYN | YXX | NXN | NNX | NNN | YXN | YXN |
| sp17        | XXN      | NXX | XXN | XXX | YXX | XNN | YXX | XNN | XXY | XNN | YXY | XNN | XNN | YXY |
| sp18        | NYN      | XXX | NNN | YXN | YNN | NYN | YXX | XYN | YNX | NXN | YXN | XXN | NXN | YXN |
| sp19        | XYN      | XXX | YXN | XXX | YYY | NNN | YXX | NYN | YXX | NYN | YXX | XYN | NXN | NXN |
| sp21        | NXN      | YXX | XXN | NXN | NXN | NYN | YXX | NYN | XXN | NYN | YYY | NYN | YNN | YXN |
| sp22        | NNN      | XNN | NNN | YNN | YXX | NYN | YYX | XYN | YYY | NYN | YXX | XYN | XXN | YXX |
| sp25        | NNX      | XXX | NXN | XXX | XXN | NNX | XNX | NNX | XXX | NXX | XXN | XNX | XNX | XXN |
| sp26        | YYY      | YNN | NNN | NNN | YNN | NNN | YYY | XYN | YYY | XNN | YNN | NNN | NNY | YNN |
| sp28        | YNN      | YNN | NNN | NXN | NXN | NYN | YNX | NYN | YNX | XYN | YXN | XYN | XNN | YNN |
| sp29        | NNY      | NXN | NXN | NXN | YNN | NYN | YNX | NYN | NYX | XYN | YYY | NYN | NYN | YXN |

There are major differences between evaluations provided by different physicians for the same vignette. For example, physician sp25 evaluated reviews retrieved for vignette 9 as *XXX* (considered all of them to be irrelevant), while physician sp26 evaluated the same reviews as *YYY* (considered all of them not only as relevant but also correctly ranked by the retrieval algorithm).

Appendix 4. Precision at 3 and group value function averaged over vignettes (95% CI)

| Participant | Precision at 3    | Group value function |
|-------------|-------------------|----------------------|
| sp2         | 0.57 [0.37, 0.77] | 0.50 [0.35, 0.65]    |
| sp3         | 0.74 [0.57, 0.91] | 0.56 [0.43, 0.69]    |
| sp4         | 0.57 [0.43, 0.72] | 0.42 [0.30, 0.54]    |
| sp5         | 0.33 [0.18, 0.49] | 0.24 [0.13, 0.34]    |
| sp6         | 0.69 [0.52, 0.86] | 0.51 [0.35, 0.66]    |
| sp7         | 0.48 [0.31, 0.64] | 0.38 [0.23, 0.52]    |
| sp8         | 0.67 [0.53, 0.80] | 0.48 [0.34, 0.62]    |
| sp9         | 0.52 [0.35, 0.70] | 0.46 [0.31, 0.61]    |
| sp10        | 0.76 [0.64, 0.89] | 0.60 [0.43, 0.76]    |
| sp11        | 0.79 [0.62, 0.95] | 0.60 [0.47, 0.73]    |
| sp12        | 0.69 [0.55, 0.84] | 0.56 [0.43, 0.68]    |
| sp14        | 0.83 [0.70, 0.97] | 0.70 [0.60, 0.79]    |
| sp16        | 0.69 [0.56, 0.82] | 0.53 [0.44, 0.63]    |
| sp17        | 0.48 [0.36, 0.59] | 0.35 [0.24, 0.46]    |
| sp18        | 0.67 [0.51, 0.82] | 0.53 [0.40, 0.66]    |
| sp19        | 0.60 [0.41, 0.78] | 0.49 [0.35, 0.62]    |
| sp21        | 0.71 [0.56, 0.87] | 0.55 [0.41, 0.68]    |
| sp22        | 0.71 [0.56, 0.87] | 0.59 [0.47, 0.71]    |
| sp25        | 0.36 [0.23, 0.48] | 0.24 [0.14, 0.34]    |
| sp26        | 0.95 [0.89, 1.02] | 0.76 [0.64, 0.87]    |
| sp28        | 0.81 [0.72, 0.90] | 0.63 [0.52, 0.74]    |
| sp29        | 0.83 [0.74, 0.92] | 0.63 [0.53, 0.73]    |

### Appendix 5. Values of Cohen's kappa for pairs of participants

| Participant | Participant |      |      |       |      |      |       |       |      |       |      |       |      |      |      |      |      |       |       |       |      |      |
|-------------|-------------|------|------|-------|------|------|-------|-------|------|-------|------|-------|------|------|------|------|------|-------|-------|-------|------|------|
|             | sp2         | sp3  | sp4  | sp5   | sp6  | sp7  | sp8   | sp9   | sp10 | sp11  | sp12 | sp14  | sp16 | sp17 | sp18 | sp19 | sp21 | sp22  | sp25  | sp26  | sp28 | sp29 |
| sp2         |             | 0.50 | 0.27 | 0.18  | 0.32 | 0.44 | 0.24  | 0.34  | 0.27 | 0.44  | 0.43 | 0.34  | 0.32 | 0.14 | 0.32 | 0.42 | 0.54 | 0.26  | -0.05 | 0.08  | 0.19 | 0.34 |
| sp3         | 0.50        |      | 0.23 | 0.03  | 0.47 | 0.38 | 0.30  | 0.34  | 0.28 | 0.61  | 0.49 | 0.47  | 0.38 | 0.22 | 0.51 | 0.43 | 0.55 | 0.30  | 0.09  | 0.29  | 0.37 | 0.50 |
| sp4         | 0.27        | 0.23 |      | 0.20  | 0.15 | 0.26 | 0.30  | 0.56  | 0.44 | 0.45  | 0.49 | 0.19  | 0.21 | 0.32 | 0.45 | 0.38 | 0.31 | 0.35  | 0.11  | 0.20  | 0.38 | 0.32 |
| sp5         | 0.18        | 0.03 | 0.20 |       | 0.00 | 0.34 | 0.07  | 0.29  | 0.01 | -0.05 | 0.06 | -0.01 | 0.17 | 0.44 | 0.10 | 0.27 | 0.07 | 0.12  | -0.19 | 0.02  | 0.07 | 0.04 |
| sp6         | 0.32        | 0.47 | 0.15 | 0.00  |      | 0.30 | 0.41  | 0.40  | 0.40 | 0.43  | 0.41 | 0.37  | 0.46 | 0.09 | 0.18 | 0.21 | 0.48 | 0.09  | 0.17  | 0.09  | 0.31 | 0.36 |
| sp7         | 0.44        | 0.38 | 0.26 | 0.34  | 0.30 |      | 0.22  | 0.35  | 0.21 | 0.26  | 0.37 | 0.20  | 0.23 | 0.50 | 0.22 | 0.49 | 0.37 | 0.37  | 0.07  | 0.05  | 0.30 | 0.27 |
| sp8         | 0.24        | 0.30 | 0.30 | 0.07  | 0.41 | 0.22 |       | 0.26  | 0.43 | 0.33  | 0.27 | 0.20  | 0.13 | 0.27 | 0.26 | 0.10 | 0.27 | 0.13  | -0.09 | 0.15  | 0.25 | 0.41 |
| sp9         | 0.34        | 0.34 | 0.56 | 0.29  | 0.40 | 0.35 | 0.26  |       | 0.58 | 0.49  | 0.40 | 0.32  | 0.34 | 0.39 | 0.29 | 0.27 | 0.41 | 0.26  | -0.06 | 0.22  | 0.32 | 0.36 |
| sp10        | 0.27        | 0.28 | 0.44 | 0.01  | 0.40 | 0.21 | 0.43  | 0.58  |      | 0.57  | 0.54 | 0.48  | 0.29 | 0.25 | 0.29 | 0.09 | 0.39 | 0.24  | 0.04  | 0.40  | 0.31 | 0.52 |
| sp11        | 0.44        | 0.61 | 0.45 | -0.05 | 0.43 | 0.26 | 0.33  | 0.49  | 0.57 |       | 0.48 | 0.38  | 0.37 | 0.19 | 0.40 | 0.32 | 0.55 | 0.22  | 0.11  | 0.38  | 0.52 | 0.68 |
| sp12        | 0.43        | 0.49 | 0.49 | 0.06  | 0.41 | 0.37 | 0.27  | 0.40  | 0.54 | 0.48  |      | 0.67  | 0.67 | 0.25 | 0.60 | 0.50 | 0.64 | 0.49  | 0.24  | 0.11  | 0.44 | 0.56 |
| sp14        | 0.34        | 0.47 | 0.19 | -0.01 | 0.37 | 0.20 | 0.20  | 0.32  | 0.48 | 0.38  | 0.67 |       | 0.55 | 0.16 | 0.49 | 0.37 | 0.52 | 0.30  | 0.14  | 0.34  | 0.26 | 0.46 |
| sp16        | 0.32        | 0.38 | 0.21 | 0.17  | 0.46 | 0.23 | 0.13  | 0.34  | 0.29 | 0.37  | 0.67 | 0.55  |      | 0.19 | 0.35 | 0.38 | 0.58 | 0.27  | 0.15  | 0.15  | 0.29 | 0.31 |
| sp17        | 0.14        | 0.22 | 0.32 | 0.44  | 0.09 | 0.50 | 0.27  | 0.39  | 0.25 | 0.19  | 0.25 | 0.16  | 0.19 |      | 0.19 | 0.33 | 0.36 | 0.22  | 0.01  | 0.15  | 0.16 | 0.18 |
| sp18        | 0.32        | 0.51 | 0.45 | 0.10  | 0.18 | 0.22 | 0.26  | 0.29  | 0.29 | 0.40  | 0.60 | 0.49  | 0.35 | 0.19 |      | 0.49 | 0.33 | 0.49  | 0.08  | 0.25  | 0.39 | 0.37 |
| sp19        | 0.42        | 0.43 | 0.38 | 0.27  | 0.21 | 0.49 | 0.10  | 0.27  | 0.09 | 0.32  | 0.50 | 0.37  | 0.38 | 0.33 | 0.49 |      | 0.36 | 0.32  | 0.12  | 0.07  | 0.25 | 0.30 |
| sp21        | 0.54        | 0.55 | 0.31 | 0.07  | 0.48 | 0.37 | 0.27  | 0.41  | 0.39 | 0.55  | 0.64 | 0.52  | 0.58 | 0.36 | 0.33 | 0.36 |      | 0.24  | 0.09  | 0.05  | 0.39 | 0.47 |
| sp22        | 0.26        | 0.30 | 0.35 | 0.12  | 0.09 | 0.37 | 0.13  | 0.26  | 0.24 | 0.22  | 0.49 | 0.30  | 0.27 | 0.22 | 0.49 | 0.32 | 0.24 |       | -0.03 | 0.25  | 0.44 | 0.30 |
| sp25        | -0.05       | 0.09 | 0.11 | -0.19 | 0.17 | 0.07 | -0.09 | -0.06 | 0.04 | 0.11  | 0.24 | 0.14  | 0.15 | 0.01 | 0.08 | 0.12 | 0.09 | -0.03 |       | -0.04 | 0.12 | 0.09 |
| sp26        | 0.08        | 0.29 | 0.20 | 0.02  | 0.09 | 0.05 | 0.15  | 0.22  | 0.40 | 0.38  | 0.11 | 0.34  | 0.15 | 0.15 | 0.25 | 0.07 | 0.05 | 0.25  | -0.04 |       | 0.28 | 0.21 |
| sp28        | 0.19        | 0.37 | 0.38 | 0.07  | 0.31 | 0.30 | 0.25  | 0.32  | 0.31 | 0.52  | 0.44 | 0.26  | 0.29 | 0.16 | 0.39 | 0.25 | 0.39 | 0.44  | 0.12  | 0.28  |      | 0.40 |
| sp29        | 0.34        | 0.50 | 0.32 | 0.04  | 0.36 | 0.27 | 0.41  | 0.36  | 0.52 | 0.68  | 0.56 | 0.46  | 0.31 | 0.18 | 0.37 | 0.30 | 0.47 | 0.30  | 0.09  | 0.21  | 0.40 |      |

For each pair of participants kappa value was computed using coded triples obtained for these participants (see Appendix 3). Specifically, for each participant, we concatenated all 14 associated triples (one triple per vignette) into a single vector of relevancy evaluations. Triples were concatenated in the same order (corresponding to the sequence of vignettes) and the resulting vector contained 52 entries corresponding to coded relevancy evaluations of individual systematic reviews. Then, these vectors were exported to the R system, where we calculated kappa values.

## Appendix 6. Selected clustering of physicians in the context of precision at 3 and group value function

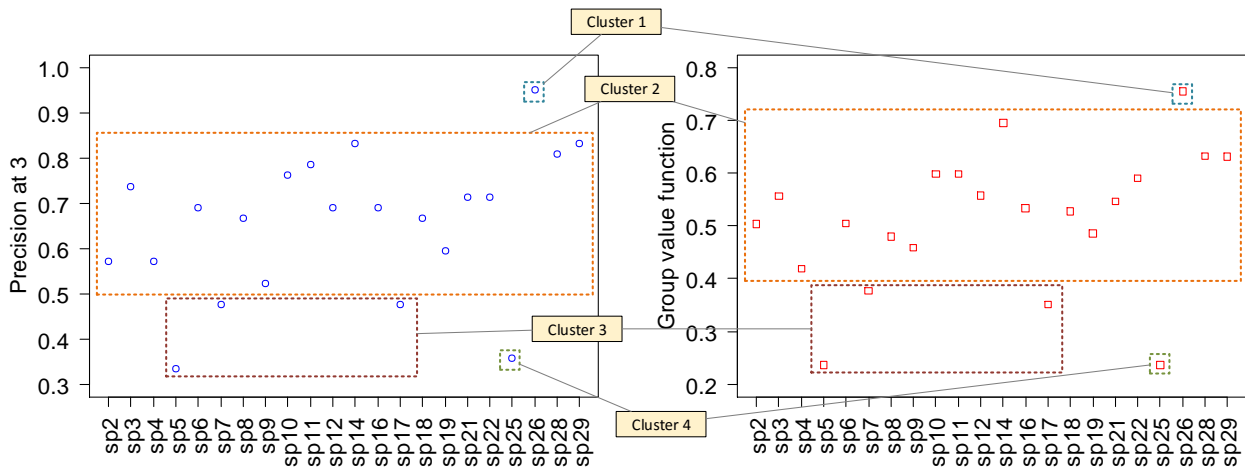

Physician sp5 from cluster 3 and sp25 from cluster 4 are very similar in terms of these two measures. However, a closer look at their coded triples (Appendix 3) reveals differences in evaluations across vignettes. For example, reviews retrieved for vignette 1 were evaluated as *XXX* by sp5 and as *NNX* by sp25, while for vignette 10 the evaluations were *NNX* for sp5 and *XXX* for sp25. While these differences were compensated after averaging values of both measures over all vignettes, they were captured by the kappa coefficient (that indicated the lack of agreement between sp5 and sp25) and resulted in placing these two physicians in two different clusters.
